# Supplementary material for: DNA barcoding of Aristolochia plants and development of species-specific multiplex PCR to aid HPTLC in ascertainment of Aristolochia herbal materials
Source: PubMed Central journal article supplement (PMC6101415; doi:10.1371/journal.pone.0202625), 2018-08-20
Supplement: pone.0202625.s002.pdf [file pone.0202625.s002.pdf]

|                                  |               |                               |                           |                                 |   |   |
|----------------------------------|---------------|-------------------------------|---------------------------|---------------------------------|---|---|
| 1                                | 1             | 1                             | 1                         | 1                               | 1 | 1 |
| 2                                | 2             | 2                             | 2                         | 2                               | 2 | 3 |
| 5                                | 6             | 7                             | 8                         | 9                               | 9 | 0 |
| 1                                | 0             | 0                             | 0                         | 0                               | 0 | 0 |
| <i>A. anguicida</i> (KP998777)   | T A T T A T T | T G A T C G A T T T G G C C A | T A T A T G C A G A A A T | C T T T C T C A T T A T T A C A |   |   |
| <i>A. gigantea</i> (KP998778)    | .             | .                             | .                         | .                               | . | . |
| <i>A. grandiflora</i> (KP998779) | .             | .                             | .                         | .                               | . | . |
| <i>A. kerrii</i> (KP998780)      | .             | C                             | .                         | G                               | . | A |
| <i>A. littoralis</i> (KP998781)  | .             | .                             | .                         | .                               | . | . |
| <i>A. pierrei</i> (KP998782)     | .             | C                             | .                         | G                               | . | A |
| <i>A. pothieri</i> (KP998783)    | .             | C                             | .                         | G                               | . | A |
| <i>A. ringens</i> (KP998784)     | .             | .                             | .                         | G                               | . | . |
| <i>A. tagala</i> (KP998786)      | .             | C                             | .                         | G                               | . | A |
| <i>A. tentaculata</i> (KP998787) | .             | C                             | .                         | G                               | . | . |
| <i>A. sp</i> (KP998785)          | .             | .                             | .                         | .                               | . | . |

|                                  |                                     |                                                               |   |   |   |   |
|----------------------------------|-------------------------------------|---------------------------------------------------------------|---|---|---|---|
| 1                                | 1                                   | 1                                                             | 1 | 1 | 1 | 1 |
| 3                                | 3                                   | 3                                                             | 3 | 3 | 3 | 3 |
| 0                                | 1                                   | 2                                                             | 3 | 4 | 5 | 5 |
| 1                                | 0                                   | 0                                                             | 0 | 0 | 0 | 0 |
| <i>A. anguicida</i> (KP998777)   | G T G G A T C C T C A A A A A A C A | T A G T T T G T A T C G A A T C A A G T A T A T A C T T C G A |   |   |   |   |
| <i>A. gigantea</i> (KP998778)    | .                                   | .                                                             | . | . | . | . |
| <i>A. grandiflora</i> (KP998779) | .                                   | .                                                             | . | . | . | . |
| <i>A. kerrii</i> (KP998780)      | .                                   | .                                                             | . | . | . | . |
| <i>A. littoralis</i> (KP998781)  | .                                   | .                                                             | . | . | . | . |
| <i>A. pierrei</i> (KP998782)     | .                                   | .                                                             | . | . | . | . |
| <i>A. pothieri</i> (KP998783)    | .                                   | .                                                             | A | G | . | . |
| <i>A. ringens</i> (KP998784)     | .                                   | .                                                             | . | . | . | . |
| <i>A. tagala</i> (KP998786)      | .                                   | .                                                             | . | . | . | . |
| <i>A. tentaculata</i> (KP998787) | .                                   | .                                                             | . | . | . | . |
| <i>A. sp</i> (KP998785)          | .                                   | .                                                             | . | . | . | . |

|                                  |                                                                                                     |   |   |   |   |   |
|----------------------------------|-----------------------------------------------------------------------------------------------------|---|---|---|---|---|
| 1                                | 1                                                                                                   | 1 | 1 | 1 | 1 | 1 |
| 3                                | 3                                                                                                   | 3 | 3 | 3 | 4 | 4 |
| 5                                | 6                                                                                                   | 7 | 8 | 9 | 9 | 0 |
| 1                                | 0                                                                                                   | 0 | 0 | 0 | 0 | 0 |
| <i>A. anguicida</i> (KP998777)   | C T T T C A T G T G C T A G A A C T T T G G C T C G T A A A C A C A A A A G T A C G G T A C G C A C |   |   |   |   |   |
| <i>A. gigantea</i> (KP998778)    | .                                                                                                   | . | . | . | . | . |
| <i>A. grandiflora</i> (KP998779) | .                                                                                                   | . | . | . | . | . |
| <i>A. kerrii</i> (KP998780)      | .                                                                                                   | . | . | . | . | . |
| <i>A. littoralis</i> (KP998781)  | .                                                                                                   | . | . | . | . | . |
| <i>A. pierrei</i> (KP998782)     | .                                                                                                   | . | . | . | . | . |
| <i>A. pothieri</i> (KP998783)    | .                                                                                                   | . | . | . | . | . |
| <i>A. ringens</i> (KP998784)     | .                                                                                                   | . | . | . | . | . |
| <i>A. tagala</i> (KP998786)      | .                                                                                                   | . | . | . | . | . |
| <i>A. tentaculata</i> (KP998787) | .                                                                                                   | . | . | . | . | . |
| <i>A. sp</i> (KP998785)          | .                                                                                                   | . | . | . | . | . |

|                                  |                                                                                                     |   |   |   |   |   |
|----------------------------------|-----------------------------------------------------------------------------------------------------|---|---|---|---|---|
| 1                                | 1                                                                                                   | 1 | 1 | 1 | 1 | 1 |
| 4                                | 4                                                                                                   | 4 | 4 | 4 | 4 | 4 |
| 0                                | 1                                                                                                   | 2 | 3 | 4 | 5 | 5 |
| 1                                | 0                                                                                                   | 0 | 0 | 0 | 0 | 0 |
| <i>A. anguicida</i> (KP998777)   | C T T T T T G A A A A A A T T A G G T T C G G A A T T C T T A G A G G A A T T C C T T A T G G A G G |   |   |   |   |   |
| <i>A. gigantea</i> (KP998778)    | .                                                                                                   | . | . | . | . | . |
| <i>A. grandiflora</i> (KP998779) | T                                                                                                   | T | . | . | . | C |
| <i>A. kerrii</i> (KP998780)      | T                                                                                                   | . | . | . | . | C |
| <i>A. littoralis</i> (KP998781)  | .                                                                                                   | . | T | . | . | A |
| <i>A. pierrei</i> (KP998782)     | T                                                                                                   | . | . | . | T | C |
| <i>A. pothieri</i> (KP998783)    | T                                                                                                   | . | . | A | . | C |
| <i>A. ringens</i> (KP998784)     | .                                                                                                   | . | . | . | . | C |
| <i>A. tagala</i> (KP998786)      | T                                                                                                   | . | . | . | T | C |
| <i>A. tentaculata</i> (KP998787) | .                                                                                                   | . | . | . | . | C |
| <i>A. sp</i> (KP998785)          | .                                                                                                   | . | . | . | . | . |

|                                  |                       |                                                                               |   |   |   |   |
|----------------------------------|-----------------------|-------------------------------------------------------------------------------|---|---|---|---|
| 1                                | 1                     | 1                                                                             | 1 | 1 | 1 | 1 |
| 4                                | 4                     | 4                                                                             | 4 | 4 | 4 | 5 |
| 5                                | 6                     | 7                                                                             | 8 | 9 | 9 | 0 |
| 1                                | 0                     | 0                                                                             | 0 | 0 | 0 | 0 |
| <i>A. anguicida</i> (KP998777)   | A A G A A C A A G T T | C T T T C T T T G A T C T T C C C A A G A A C C T C T T C T A T T T C A C A T |   |   |   |   |
| <i>A. gigantea</i> (KP998778)    | .                     | .                                                                             | . | . | . | . |
| <i>A. grandiflora</i> (KP998779) | .                     | A                                                                             | . | . | . | G |
| <i>A. kerrii</i> (KP998780)      | .                     | .                                                                             | . | . | . | G |
| <i>A. littoralis</i> (KP998781)  | .                     | .                                                                             | . | . | . | . |
| <i>A. pierrei</i> (KP998782)     | .                     | .                                                                             | . | . | . | G |
| <i>A. pothieri</i> (KP998783)    | .                     | .                                                                             | . | . | A | G |
| <i>A. ringens</i> (KP998784)     | .                     | T                                                                             | . | . | . | G |
| <i>A. tagala</i> (KP998786)      | .                     | .                                                                             | . | . | . | G |
| <i>A. tentaculata</i> (KP998787) | .                     | .                                                                             | . | C | . | G |
| <i>A. sp</i> (KP998785)          | .                     | .                                                                             | . | . | . | . |
