# Supplementary material for: DNA barcoding of Aristolochia plants and development of species-specific multiplex PCR to aid HPTLC in ascertainment of Aristolochia herbal materials
Source: PubMed Central journal article supplement (PMC6101415; doi:10.1371/journal.pone.0202625), 2018-08-20
Supplement: pone.0202625.s005.pdf [file pone.0202625.s005.pdf]

3 3 3 3 3 4 4  
5 6 7 8 9 0 1  
1 0 0 ITS-Arls-390F 0 0 0 0 0

*A. anguicida* (KP998791) - - - - - T A A T T G C A G A A - A C C G C G A A C C A T C G A G T C T T T G A A C G C A A G T T G  
*A. gigantea* (KP998792) T G C G A T A C T T G G T G T G . . . . . T C . . . . .  
*A. grandiflora* (KP998793) T G C G A T A C T T G G T G T G . . . . . T C . . . . .  
*A. kerrii* (KP998794) - - - - - . . . . . C . G . . . . . G . . . . .  
*A. littoralis* (KP998795) T G C G A T A C T T G G T G T G . . . . . T C . . . . .  
*A. pierrei* (KP998796) - - - - - . . . . . . . . . . . . . . . . . . . . . . . . . . . . . . . . . . . . . . . . .  
*A. pothieri* (KP998797) T G C G A T A C T T G G T G T G . . . . . T C . . . . .  
*A. ringens* (KP998798) T G C G A T A C T T G G T G T G . . . . . T C . . . . .  
*A. tagata* (KP998800) - - - - - . . . . . C . . . . . . . . . . . . . . . . . . . . . . . . . . . . . . . . . . . . . . . . .  
*A. tentaculata* (KP998801) T G C G A T A C T T G G T G T G . . . . . T C . . . . .  
*A. sp* (KP998799) T G C G A T A C T T G G T G T G . . . . . T C . . . . .  
*R. pulchellum* (MG870094) T G C G A T A G T T G G T G T G . . . . . T C . . . . .  
*G. integrifolium* (MG870090) T G C G A T A C T T G G T G T G . . . . . G . T C . . . . . C . . . . .  
*J. sambac* (MG870093) T G C G A T A C T T G G T G T G . . . . . T C . . . . . T . . . . . T . . . . .  
*J. adenophyllum* (MG870091) T G C G A T A C T T G G T G T G . . . . . T C . . . . . T . . . . . T . . . . .  
*J. sp* (MG870092) T G C G A T A C T T G G T G T G . . . . . T C . . . . . T . . . . . T . . . . .

4 4 4 4 4 4 4  
1 2 3 4 5 6 7  
1 0 0 0 0 0 0

*A. anguicida* (KP998791) C A C C C G A G G C C A C T A G G T C G A G G G T A C A C C T G C C T G G G C G T C A C G C C C G A C G T G T C T C C  
*A. gigantea* (KP998792) . . . . . . . . . . . . . . . . . . . . . . . . . . . . . . . . . . . . . . . . . . . . . . . . . . . . . . . . . . . .  
*A. grandiflora* (KP998793) . . . . . . . . . . . . . . . . . . . . . . . . . . . . . . . . . . . . . . . . . . . . . . . . . . . . . . . . . . . .  
*A. kerrii* (KP998794) . . . . . . . . . . . . . . . . . . . . . . . . . . . . . . . . . . . . . . . . . . . . . . . . . . . . . . . . . . . .  
*A. littoralis* (KP998795) . . . . . . . . . . . . . . . . . . . . . . . . . . . . . . . . . . . . . . . . . . . . . . . . . . . . . . . . . . . .  
*A. pierrei* (KP998796) . . . . . . . . . . . . . . . . . . . . . . . . . . . . . . . . . . . . . . . . . . . . . . . . . . . . . . . . . . . .  
*A. pothieri* (KP998797) . G . . . . . T G . . . . . C . . . . . C . . . . . . . . . . . . . . . . . . . . . . . . . . . . . . . . . . . . . . . . .  
*A. ringens* (KP998798) . . . . . . . . . . . . . . . . . . . . . . . . . . . . . . . . . . . . . . . . . . . . . . . . . . . . . . . . . . . .  
*A. tagata* (KP998800) . . . . . . . . . . . . . . . . . . . . . . . . . . . . . . . . . . . . . . . . . . . . . . . . . . . . . . . . . . . .  
*A. tentaculata* (KP998801) . . . . . . . . . . . . . . . . . . . . . . . . . . . . . . . . . . . . . . . . . . . . . . . . . . . . . . . . . . . .  
*A. sp* (KP998799) . . . . . . . . . . . . . . . . . . . . . . . . . . . . . . . . . . . . . . . . . . . . . . . . . . . . . . . . . . . .  
*R. pulchellum* (MG870094) . G . . . . . A . . . . . T . . . . . C . . . . . C . . . . . G T . . . . . . . . . . . A T T G . . . . . C G . . . . . C . . . . .  
*G. integrifolium* (MG870090) . G . . . . . G A . . . . . T T C T . . . . . C . . . . . G T . . . . . . . . . . . A T C G . . . . . A T C G . . . . . G . . . . .  
*J. sambac* (MG870093) . G . . . . . A . . . . . T . . . . . G T . . . . . C T . . . . . C . . . . . G . . . . . . . . . . . A T C . . . . . C G C . . . . . C T T . . . . .  
*J. adenophyllum* (MG870091) . G . . . . . A . . . . . T . . . . . G T . . . . . C T . . . . . C . . . . . G T . . . . . . . . . . . A T C . . . . . C G C . . . . . C T T . . . . .  
*J. sp* (MG870092) . G . . . . . A . . . . . T . . . . . G T . . . . . C T . . . . . C . . . . . G . . . . . . . . . . . A T C . . . . . C G C . . . . . C T T . . . . .

4 4 4 5 5 5 5  
7 8 9 0 1 2 3  
1 0 0 0 0 0 0

*A. anguicida* (KP998791) C C C C - - - - A C C C C G C G C G C C C C G C C C G C G C G G G C G G C G C C G - - C G C G T C G - A C G G G  
*A. gigantea* (KP998792) . . . . . G . . . . . T . . . . . A T . . . . . . . . . . . G . . . . . . . . . . . G . . . . . . . . . . . A T . . . . .  
*A. grandiflora* (KP998793) . . . . . T . . . . . A . . . . . . . . . . . A C . . . . . . . . . . . C . . . . . G . . . . . T C . . . . .  
*A. kerrii* (KP998794) . . . . . G . . . . . T . . . . . G . . . . . . . . . . . . . . . . . . . . . . . . . . . . . . . . . . . . . . . . . .  
*A. littoralis* (KP998795) . . . . . C - - - - G . . . . . T . . . . . A . . . . . . . . . . . G G . . . . . . . . . . . . . . . . . . . . . . . . . . . .  
*A. pierrei* (KP998796) . . . . . G . . . . . A . . . . . . . . . . . . . . . . . . . . . . . . . . . . . . . . . . . . . . . . . . . . . . . .  
*A. pothieri* (KP998797) . . A C - - - - G . . . . . T . . . . . I T . . . . . G . . . . . A T . . . . . G . . . . . . . . . . . G . . . . . . . . . . .  
*A. ringens* (KP998798) . . . . . G . . . . . C . . . . . A A . . . . . . . . . . . C . . . . . . . . . . . . . . . . . . . . . . . . . . . .  
*A. tagata* (KP998800) . . . . . G . . . . . T . . . . . . . . . . . . . . . . . . . . . . . . . . . . . . . . . . . . . . . . . . . . . . . .  
*A. tentaculata* (KP998801) . . . . . C C A - C . . . . . T . . . . . C T . . . . . G A G . . . . . T C T . . . . . G . . . . . . . . . . . T . . . . . . . . . . .  
*A. sp* (KP998799) . . . . . . . . . . . . . . . . . . . . . . . . . . . . . . . . . . . . . . . . . . . . . . . . . . . . . . . . . . . .  
*R. pulchellum* (MG870094) . . . . . G C C T - G A . . . . . T . . . . . T C T . . . . . A A . . . . . G . . . . . G T C T . . . . . A G . . . . . T G . . . . .  
*G. integrifolium* (MG870090) . . . . . A C G C A A C . . . . . A . . . . . T . . . . . . . . . . . G T T T . . . . . T . . . . . . . . . . . G . . . . . . . . . . .  
*J. sambac* (MG870093) T . . . . . G . . . . . C A C T G G . . . . . A . . . . . . . . . . . . . . . . . . . . . . . . . . . . . . . . . . . . . . . . . . . . . . . . . . . . . .  
*J. adenophyllum* (MG870091) . G . . . . . A C C A G G . . . . . T T T . . . . . . . . . . . . . . . . . . . . . . . . . . . . . . . . . . . . . . . . . . . . . . . . . . . . . . . . . . . .  
*J. sp* (MG870092) T . . . . . G . . . . . C A C T G G . . . . . A . . . . . . . . . . . . . . . . . . . . . . . . . . . . . . . . . . . . . . . . . . . . . . . . . . . . . .  
T . . . . . G . . . . . C A C T G G . . . . . A . . . . . . . . . . . . . . . . . . . . . . . . . . . . . . . . . . . . . . . . . . . . . . . . . . . . . .

5 5 5 5 5 5 5  
3 4 5 6 7 8 9  
1 0 0 0 0 0 0

ITS2-taF

*A. anguicida* (KP998791) G G C G A G C A G A T T G G C C G T C C C T G - - - C C C C C C - - - G G G G C G A G G T T G G C T G A A A A A A C G -  
*A. gigantea* (KP998792) . . . . . . . . . . . . . . . . . . . . . . . . . . . . . . . . . . . . . . . . . . . . . . . . . . . . . . . . . . . .  
*A. grandiflora* (KP998793) . . . . . . . . . . . . . . . . . . . . . . . . . . . . . . . . . . . . . . . . . . . . . . . . . . . . . . . . . . . .  
*A. kerrii* (KP998794) . . . . . . . . . . . . . . . . . . . . . . . . . . . . . . . . . . . . . . . . . . . . . . . . . . . . . . . . . . . .  
*A. littoralis* (KP998795) . . . . . . . . . . . . . . . . . . . . . . . . . . . . . . . . . . . . . . . . . . . . . . . . . . . . . . . . . . . .  
*A. pierrei* (KP998796) . . . . . . . . . . . . . . . . . . . . . . . . . . . . . . . . . . . . . . . . . . . . . . . . . . . . . . . . . . . .  
*A. pothieri* (KP998797) . . . . . . . . . . . . . . . . . . . . . . . . . . . . . . . . . . . . . . . . . . . . . . . . . . . . . . . . . . . .  
*A. ringens* (KP998798) . . . . . . . . . . . . . . . . . . . . . . . . . . . . . . . . . . . . . . . . . . . . . . . . . . . . . . . . . . . .  
*A. tagata* (KP998800) . . . . . . . . . . . . . . . . . . . . . . . . . . . . . . . . . . . . . . . . . . . . . . . . . . . . . . . . . . . .  
*A. tentaculata* (KP998801) . . . . . . . . . . . . . . . . . . . . . . . . . . . . . . . . . . . . . . . . . . . . . . . . . . . . . . . . . . . .  
*A. sp* (KP998799) . . . . . . . . . . . . . . . . . . . . . . . . . . . . . . . . . . . . . . . . . . . . . . . . . . . . . . . . . . . .  
*R. pulchellum* (MG870094) . . G . . . . . C . . . . . G A G . . . . . T T C . . . . . . . . . . . A G - - T . . . . . T T T . . . . . C . . . . . C A . . . . . C T G . . . . . C A C G  
*G. integrifolium* (MG870090) . . . . . A . . . . . C G C . . . . . T C . . . . . G . . . . . G A . . . . . T C . . . . . C . . . . . A . . . . . T . . . . . T T . . . . .  
*J. sambac* (MG870093) . . G T T . . . . . G A G . . . . . T C . . . . . G . . . . . G . . . . . G . . . . . C C . . . . . C . . . . . C C . . . . . C C . . . . . C C . . . . .  
*J. adenophyllum* (MG870091) . . G C T . . . . . G A G . . . . . T C . . . . . G . . . . . T G . . . . . C T . . . . . T C . . . . . . . . . . . C C . . . . . T G . . . . .  
*J. sp* (MG870092) . . G T T . . . . . G A G . . . . . T C . . . . . G . . . . . G . . . . . C C . . . . . C . . . . . C . . . . . C C . . . . . C C . . . . .

5 6 6 6 6 6 6  
9 0 1 2 3 4 5  
1 0 0 0 0 0 0

ITS2-piF

*A. anguicida* (KP998791) - - C I G T G C C C C G C - - - G G G C A C T T C G G C A C G A C G - - - A G T G G T G G C T C C G C C C T C C C C G G  
*A. gigantea* (KP998792) - G . . . . . T . . . . . . . . . . . . . . . . . . . . . . . . . . . . . . . . . . . . . . . . . . . . . . . . . . . . . . . . . . . .  
*A. grandiflora* (KP998793) - - - - - A . . . . . T . . . . . A . . . . . G . . . . . T . . . . . . . . . . . G . . . . . . . . . . . . . . . . . . . . . . . . . . . . . . . . . . . . . . . . .  
*A. kerrii* (KP998794) T C G G A G A G . . . . . G C . . . . . T . . . . . G . . . . . C - - G T . . . . . . . . . . . G A A G . . . . . C . . . . .  
*A. littoralis* (KP998795) - G . . . . . T . . . . . . . . . . . . . . . . . . . . . . . . . . . . . . . . . . . . . . . . . . . . . . . . . . . . . . . . . . . .  
*A. pierrei* (KP998796) - - - - - A A . . . . . A . . . . . T . . . . . G . . . . . T . . . . . C . . . . . . . . . . . A G . . . . . A . . . . . C . . . . .  
*A. pothieri* (KP998797) - - - - - G . . . . . C G G . . . . . T . . . . . G . . . . . T . . . . . G C . . . . . . . . . . . G A T G . . . . . . . . . . .  
*A. ringens* (KP998798) - - - - - T . . . . . . . . . . . . . . . . . . . . . . . . . . . . . . . . . . . . . . . . . . . . . . . . . . . . . . . . . . . .  
*A. tagata* (KP998800) - - - - - A A . . . . . A . . . . . T . . . . . G . . . . . T . . . . . C . . . . . . . . . . . A G . . . . . . . . . . . C . . . . .  
*A. tentaculata* (KP998801) - C T . . . . . . . . . . . A . . . . . . . . . . . G . . . . . G . . . . . . . . . . . . . . . . . . . . . . . . . . . . . . . . . . . . . . . . . .  
*A. sp* (KP998799) - - - - - . . . . . . . . . . . . . . . . . . . . . . . . . . . . . . . . . . . . . . . . . . . . . . . . . . . . . . . . . . . .  
*R. pulchellum* (MG870094) G T T C C C T . . . . . G . . . . . . . . . . . A . . . . . T . . . . . G . . . . . A . . . . . . . . . . . T C . . . . . . . . . . .  
*G. integrifolium* (MG870090) - - - - - A . . . . . T C G - - C . . . . . C T G . . . . . T . . . . . . . . . . . A C T A C G . . . . . T . . . . . . . . . . . A A . . . . .  
*J. sambac* (MG870093) - - - - - T C . . . . . G A T . . . . . G . . . . . A C T . . . . . G . . . . . G T C T T . . . . . A . . . . . T . . . . . T . . . . . A A . . . . . A T . . . . . A A  
*J. adenophyllum* (MG870091) - - - - - A T . . . . . G . . . . . A C T . . . . . A G . . . . . G T C . . . . . T . . . . . A . . . . . T . . . . . T . . . . . A A . . . . . A T . . . . . A A  
*J. sp* (MG870092) - - - - - T C . . . . . G A T . . . . . G . . . . . A C T . . . . . G . . . . . G T C T T . . . . . A . . . . . T . . . . . T . . . . . A A . . . . . A T . . . . . A A

|  |   |   |   |   |   |   |   |
|--|---|---|---|---|---|---|---|
|  | 6 | 6 | 6 | 6 | 6 | 7 | 7 |
|  | 5 | 6 | 7 | 8 | 9 | 0 | 1 |
|  | 1 | 0 | 0 | 0 | 0 | 0 | 0 |

*A. anguicida* (KP998791) C C C T - - - G C G T G G C T C G A A G T C G T G T C C G A G G C C - - - - - C G G G C - T G  
*A. gigantea* (KP998792) . . . . .  
*A. grandiflora* (KP998793) . . . T . T - - - T T A . . . . . T . . . . . C C C C G T T G A . . . . . A  
*A. kerrii* (KP998794) G . . C C C A . . C G . . . C . . . . . C . C . . . C . T . . . . . C C C C G C T C G G G A A . . . . . C C  
*A. littoralis* (KP998795) . . . . .  
*A. pierrei* (KP998796) G . . . T G . . . C G . . . C . . . . . C . C A . . C . A A . . . . . C C C C G C T G G G A A . T . . . . . C  
*A. pothieri* (KP998797) . . . . . C G . . G G . . . . . C . A T . . C . A A . . . . . C C C G G C C G G G A A . . . . . C .  
*A. ringens* (KP998798) . . . . .  
*A. tagala* (KP998800) G . . . T G . . . C G . . . C . . . . . C . C . . . C . A A . . . . . C C C C G C T G G A A A . . . . . C  
*A. tentaculata* (KP998801) . . . . .  
*A. sp* (KP998799) . . . . .  
*R. pulchellum* (MG870094) . . . . . T C T T . G A . T . . C G . . . T T G . . . . . C . . . . . C G G . A . . . . .  
*G. integrifolium* (MG870090) . . . . . T A . C G C . . . C . A . . T C A . . . C G C A C A C C T C C T C C C C T G . . A . . . . .  
*J. sambac* (MG870093) . . . . . T T . . . . . G T . T T . . . . . A . . T . T . . C G . . . . .  
*J. adenophyllum* (MG870091) . . . . . T T . . . . . G T . T T . . . . . A . . T . T . . C G . . . . .  
*J. sp* (MG870092) . . . . . T T . . . . . G T . T T . . . . .

|  |   |   |   |   |   |   |   |
|--|---|---|---|---|---|---|---|
|  | 7 | 7 | 7 | 7 | 7 | 7 | 7 |
|  | 1 | 2 | 3 | 4 | 5 | 6 | 7 |
|  | 1 | 0 | 0 | 0 | 0 | 0 | 0 |

IIS2-poF →

*A. anguicida* (KP998791) T G A A G A A G G A - - - - - C C C C T G C C G G C A - G T C G C C T C - - - - - C G C G A G C - - G  
*A. gigantea* (KP998792) C . . . . . C . . . . . C . . . . . C . . . . .  
*A. grandiflora* (KP998793) C . . . . . C . . . . . C . . . . . T . . . . . C T . . . . . C G . . . . . T . C . . . . . A C T . .  
*A. kerrii* (KP998794) C . . G . . . . . C . . . . . C . . . . . C I T . G C . C T . . . . . C . . . . . C G T . T C . .  
*A. littoralis* (KP998795) C . . . . . C . . . . . C . . . . . C G . . . . . C . . . . .  
*A. pierrei* (KP998796) C . . . . . C . . . . . T . . . . . C . . . . . G C . T C - - - - - T G T G T . . . . .  
*A. pothieri* (KP998797) C . . . . . A A T G . . . . . G C C C . . . . . C . G G G G A C C . . . . . G . G A G - - - . .  
*A. ringens* (KP998798) C . C . . . . .  
*A. tagala* (KP998800) C . . . . . T . . . . . C . . . . . G C . T C - - - - - G T . T . . . . .  
*A. tentaculata* (KP998801) . . . G A G . . . . .  
*A. sp* (KP998799) . . . . .  
*R. pulchellum* (MG870094) C . T C . . G . . G A G C A T T I G G A C . T G . . G T . . G A . C T . A G C . C T T C G C C T T . . G C G . - A  
*G. integrifolium* (MG870090) . . . G C G . . . . . T . . . . . T . . . . . C . A . C . T C T G A A . . . T C G T . C C C A  
*J. sambac* (MG870093) . . . . . A G - - - - - T . . . . . A . . . . . G C . . . . . C A T . G . . . T . T C C G G A T G . . . T T G . . . C C T C  
*J. adenophyllum* (MG870091) . . . . . A G - - - - - T . . . . . A . . . . . G C . . . . . C A T . G . . . T . T C C G G A T G . . . T T G . . . C C T C  
*J. sp* (MG870092) . . . . . A G - - - - - T . . . . . A . . . . . G C . . . . . C A T . G . . . T . T C C G G A T G . . . T T G . . . C C T C

|  |   |   |   |   |   |   |   |
|--|---|---|---|---|---|---|---|
|  | 7 | 7 | 7 | 8 | 8 | 8 | 8 |
|  | 7 | 8 | 9 | 0 | 1 | 2 | 3 |
|  | 1 | 0 | 0 | 0 | 0 | 0 | 0 |

*A. anguicida* (KP998791) G A G G C C T - - T G C T C - - - G G A T T G C G A C C C C A G G T C A G G T G G G A A C A C C C G C T G A G T T T A A  
*A. gigantea* (KP998792) . . . . . T . . . . .  
*A. grandiflora* (KP998793) . . . . . A G C - C . . . . . T . . . . .  
*A. kerrii* (KP998794) . . . . . G C G C . . . . . A . . . . . T G . . . . . A C . . . . .  
*A. littoralis* (KP998795) . . . . . C . T . . . . .  
*A. pierrei* (KP998796) . . . . . T . . . . . G C G C . . . . . A . . . . . T . . . . .  
*A. pothieri* (KP998797) . . . . . T . . . . . G C G C C . . . . . A . . . . . T . . . . .  
*A. ringens* (KP998798) . . . . . C . . . . .  
*A. tagala* (KP998800) . . . . . T . . . . . G C G C . . . . . A . . . . . T . . . . .  
*A. tentaculata* (KP998801) . . . . . C . . . . . A . . . . .  
*A. sp* (KP998799) . . . . .  
*R. pulchellum* (MG870094) . . . . . G . . . . . G A A C . C . A A - - - C . G . . . . . C . . . . . G C T . . . . .  
*G. integrifolium* (MG870090) A . . . . . A . G A - - - - - T C G A C . . . . . C . . . . . C T . . . . .  
*J. sambac* (MG870093) A C . . . . . T G C A C C . . . . . A . C C T C . . . . . C . . . . . C T . . . . .  
*J. adenophyllum* (MG870091) A C . . . . . T G C G C C . . . . . A . C T T C . . . . . C . . . . . C T . . . . .  
*J. sp* (MG870092) A C . . . . . T G C A C C . . . . . A . C C T C . . . . . C . . . . . C T . . . . .

|  |   |   |   |   |
|--|---|---|---|---|
|  | 8 | 8 | 8 | 8 |
|  | 3 | 4 | 5 | 5 |
|  | 1 | 0 | 0 | 5 |

← IIS4

*A. anguicida* (KP998791) G C A T A T C A - - - - -  
*A. gigantea* (KP998792) . . . . . A T A A G C G G A G G A A A T C G  
*A. grandiflora* (KP998793) . . . . . A T A - - - - -  
*A. kerrii* (KP998794) . . . . . G - - - - -  
*A. littoralis* (KP998795) . . . . . A T A - - - - -  
*A. pierrei* (KP998796) . . . . .  
*A. pothieri* (KP998797) . . . . . A T A - - - - -  
*A. ringens* (KP998798) . . . . . A T A - - - - -  
*A. tagala* (KP998800) . . . . .  
*A. tentaculata* (KP998801) . . . . . A T A - - - - -  
*A. sp* (KP998799) . . . . . A T A - - - - -  
*R. pulchellum* (MG870094) . . . . . A - - - - -  
*G. integrifolium* (MG870090) . . . . . A - - - - -  
*J. sambac* (MG870093) . . . . . A T A A - - - - -  
*J. adenophyllum* (MG870091) . . . . . A T A A - - - - -  
*J. sp* (MG870092) . . . . . A - - - - -
